# Supplementary material for: Association between serum iron status and gout: results from the NHANES and Mendelian randomization study
Source: Royal Society of Chemistry journal article supplement (doi:10.1039/d4fo00294f), 2025-01-01
Supplement: d4fo00294f1.pdf [file d4fo00294f1.pdf]

**Supplementary Material for**

**Supplementary Table 1.** STROBE Statement—Checklist of items that should be included in reports of *cross-sectional studies*.

**Supplementary Table 2.** STROBE-MR checklist of recommended items to address in reports of Mendelian randomization studies<sup>1 2</sup>.

**Supplementary Table 3.** Characteristics of the genetic variants associated with the serum iron status indicators.

**Supplementary Table 4.** Odds ratio (95% CI) for prevalent gout according to serum iron status indicators among participants in NHANES 2017–2018 (N=4,635).

**Supplementary Table 5.** Odds ratio (95% CI) for prevalent gout according to serum iron status indicators among male adults in NHANES 2017–2018 (N = 2,216).

**Supplementary Table 6.** Odds ratio (95% CI) for prevalent gout according to serum iron status indicators among female adults in NHANES 2017–2018 (N = 2,419).

**Supplementary Table 7.** Odds ratio (95% CI) for prevalent gout according to serum iron status indicators among people older than 50 years in NHANES 2017–2018 (N = 2,465).

**Supplementary Table 8.** Odds ratio (95% CI) for prevalent gout according to serum iron status indicators among people less than 50 years in NHANES 2017–2018 (N = 2,170).

**Supplementary Table 9.** Odds ratio (95% CI) for prevalent gout according to serum iron status indicators among participants in NHANES 2017–2018 (weighted) after multiple imputations (N=4,881).

**Supplementary Table 10.** Odds ratio (95% CI) for prevalent gout according to serum iron status indicators among participants in NHANES 2017–2018 after fully adjusted.

**Supplementary Table 11.** Odds ratio (95% CI) for prevalent gout according to serum iron status indicators after propensity score matching by sex and age in a ratio of 1:4 (N=1,271).

**Supplementary Table 12.** Effect estimates of the associations between serum iron status indicators and risk of gout in FinnGen.

**Supplementary Table 13.** Effect estimates of the associations between serum iron status indicators and risk of gout in Global Urate Genetics Consortium.

**Supplementary Table 1.** STROBE Statement—Checklist of items that should be included in reports of *cross-sectional studies*.

|                              | Item No | Recommendation                                                                                                                                                                       | Page No |
|------------------------------|---------|--------------------------------------------------------------------------------------------------------------------------------------------------------------------------------------|---------|
| <b>Title and abstract</b>    | 1       | (a) Indicate the study's design with a commonly used term in the title or the abstract                                                                                               | 1-2     |
|                              |         | (b) Provide in the abstract an informative and balanced summary of what was done and what was found                                                                                  | 1-2     |
| <b>Introduction</b>          |         |                                                                                                                                                                                      |         |
| Background/rationale         | 2       | Explain the scientific background and rationale for the investigation being reported                                                                                                 | 2-3     |
| Objectives                   | 3       | State specific objectives, including any prespecified hypotheses                                                                                                                     | 3-4     |
| <b>Methods</b>               |         |                                                                                                                                                                                      |         |
| Study design                 | 4       | Present key elements of study design early in the paper                                                                                                                              | 4       |
| Setting                      | 5       | Describe the setting, locations, and relevant dates, including periods of recruitment, exposure, follow-up, and data collection                                                      | 4-5     |
| Participants                 | 6       | (a) Give the eligibility criteria, and the sources and methods of selection of participants                                                                                          | 4       |
| Variables                    | 7       | Clearly define all outcomes, exposures, predictors, potential confounders, and effect modifiers. Give diagnostic criteria, if applicable                                             | 5-6     |
| Data sources/<br>measurement | 8*      | For each variable of interest, give sources of data and details of methods of assessment (measurement). Describe comparability of assessment methods if there is more than one group | 5-6     |
| Bias                         | 9       | Describe any efforts to address potential sources of bias                                                                                                                            | 5-6     |
| Study size                   | 10      | Explain how the study size was arrived at                                                                                                                                            | 4       |
| Quantitative variables       | 11      | Explain how quantitative variables were handled in the analyses. If applicable, describe which groupings were chosen and why                                                         | 6       |
| Statistical methods          | 12      | (a) Describe all statistical methods, including those used to control for confounding                                                                                                | 6       |
|                              |         | (b) Describe any methods used to examine subgroups and interactions                                                                                                                  | 6       |
|                              |         | (c) Explain how missing data were addressed                                                                                                                                          | 4       |
|                              |         | (d) If applicable, describe analytical methods                                                                                                                                       | 6       |

|                   |     |                                                                                                                                                                                                              |                          |
|-------------------|-----|--------------------------------------------------------------------------------------------------------------------------------------------------------------------------------------------------------------|--------------------------|
|                   |     | taking account of sampling strategy                                                                                                                                                                          |                          |
|                   |     | (e) Describe any sensitivity analyses                                                                                                                                                                        | 6-7                      |
| <b>Results</b>    |     |                                                                                                                                                                                                              |                          |
| Participants      | 13* | (a) Report numbers of individuals at each stage of study—eg numbers potentially eligible, examined for eligibility, confirmed eligible, included in the study, completing follow-up, and analysed            | 10                       |
|                   |     | (b) Give reasons for non-participation at each stage                                                                                                                                                         | 4, Study design          |
|                   |     | (c) Consider use of a flow diagram                                                                                                                                                                           | Figure 1                 |
| Descriptive data  | 14* | (a) Give characteristics of study participants (eg demographic, clinical, social) and information on exposures and potential confounders                                                                     | 26, Table 2              |
|                   |     | (b) Indicate number of participants with missing data for each variable of interest                                                                                                                          | NA                       |
| Outcome data      | 15* | Report numbers of outcome events or summary measures                                                                                                                                                         | 26, Table 2              |
| Main results      | 16  | (a) Give unadjusted estimates and, if applicable, confounder-adjusted estimates and their precision (eg, 95% confidence interval). Make clear which confounders were adjusted for and why they were included | Supplementary Table 4    |
|                   |     | (b) Report category boundaries when continuous variables were categorized                                                                                                                                    | Supplementary Table 4    |
|                   |     | (c) If relevant, consider translating estimates of relative risk into absolute risk for a meaningful time period                                                                                             | NA                       |
| Other analyses    | 17  | Report other analyses done—eg analyses of subgroups and interactions, and sensitivity analyses                                                                                                               | Supplementary Table 5-12 |
| <b>Discussion</b> |     |                                                                                                                                                                                                              |                          |
| Key results       | 18  | Summarise key results with reference to study objectives                                                                                                                                                     | 11                       |
| Limitations       | 19  | Discuss limitations of the study, taking into account sources of potential bias or imprecision. Discuss both direction and magnitude of any potential bias                                                   | 14-15                    |
| Interpretation    | 20  | Give a cautious overall interpretation of results considering objectives, limitations, multiplicity of analyses, results from similar studies, and other relevant evidence                                   | 12-13                    |
| Generalisability  | 21  | Discuss the generalisability (external validity) of the study results                                                                                                                                        | 12-13                    |

**Other information**

|         |    |                                                                                                                                                               |    |
|---------|----|---------------------------------------------------------------------------------------------------------------------------------------------------------------|----|
| Funding | 22 | Give the source of funding and the role of the funders for the present study and, if applicable, for the original study on which the present article is based | 17 |
|---------|----|---------------------------------------------------------------------------------------------------------------------------------------------------------------|----|

\*Give information separately for exposed and unexposed groups.

**Note:** An Explanation and Elaboration article discusses each checklist item and gives methodological background and published examples of transparent reporting. The STROBE checklist is best used in conjunction with this article (freely available on the Web sites of PLoS Medicine at <http://www.plosmedicine.org/>, Annals of Internal Medicine at <http://www.annals.org/>, and Epidemiology at <http://www.epidem.com/>). Information on the STROBE Initiative is available at [www.strobe-statement.org](http://www.strobe-statement.org).

**Supplementary Table 2.** STROBE-MR checklist of recommended items to address in reports of Mendelian randomization studies<sup>1 2</sup>.

| Item No.            | Section                              | Checklist item                                                                                                                                                                                                                            | Page No. | Relevant text from manuscript                                                                                                                                                                                                                            |
|---------------------|--------------------------------------|-------------------------------------------------------------------------------------------------------------------------------------------------------------------------------------------------------------------------------------------|----------|----------------------------------------------------------------------------------------------------------------------------------------------------------------------------------------------------------------------------------------------------------|
| 1                   | <b>TITLE and ABSTRACT</b>            | Indicate Mendelian randomization (MR) as the study's design in the title and/or the abstract if that is a main purpose of the study                                                                                                       | 1-2      | Association between serum iron status and gout: results from the NHANES and Mendelian randomization study                                                                                                                                                |
| <b>INTRODUCTION</b> |                                      |                                                                                                                                                                                                                                           |          |                                                                                                                                                                                                                                                          |
| 2                   | <b>Background</b>                    | Explain the scientific background and rationale for the reported study. What is the exposure? Is a potential causal relationship between exposure and outcome plausible? Justify why MR is a helpful method to address the study question | 3-4      | Mendelian randomization (MR) is a specialized form of instrumental variable (IV) analysis that employs genetic variants as instruments to identify and quantify potential causal relationships between exposure and outcome 16.                          |
| 3                   | <b>Objectives</b>                    | State specific objectives clearly, including pre-specified causal hypotheses (if any). State that MR is a method that, under specific assumptions, intends to estimate causal effects                                                     | 3-4      | Subsequently, we further conducted MR analysis utilizing publicly available genetic data to identify the potential causal relationship of ferritin, serum iron, total iron-binding capacity (TIBC), transferrin saturation (TSAT) with the risk of gout. |
| <b>METHODS</b>      |                                      |                                                                                                                                                                                                                                           |          |                                                                                                                                                                                                                                                          |
| 4                   | <b>Study design and data sources</b> | Present key elements of the study design early in the article. Consider including a table listing sources of data for all phases of the study. For each data source contributing to the analysis, describe the following:                 |          |                                                                                                                                                                                                                                                          |

|   |                                           |                                                                                                                                                                                                                                 |     |                                                                                                                                                                                      |
|---|-------------------------------------------|---------------------------------------------------------------------------------------------------------------------------------------------------------------------------------------------------------------------------------|-----|--------------------------------------------------------------------------------------------------------------------------------------------------------------------------------------|
|   | a)                                        | Setting: Describe the study design and the underlying population, if possible. Describe the setting, locations, and relevant dates, including periods of recruitment, exposure, follow-up, and data collection, when available. | 7-8 | 2.3.1 Exposure sources of serum iron status indicators;<br>2.3.2 Outcome sources of gout                                                                                             |
|   | b)                                        | Participants: Give the eligibility criteria, and the sources and methods of selection of participants. Report the sample size, and whether any power or sample size calculations were carried out prior to the main analysis    | 7-8 | 2.3.1 Exposure sources of serum iron status indicators;<br>2.3.2 Outcome sources of gout                                                                                             |
|   | c)                                        | Describe measurement, quality control and selection of genetic variants                                                                                                                                                         | 8-9 | 2.3.3 Statistical analysis                                                                                                                                                           |
|   | d)                                        | For each exposure, outcome, and other relevant variables, describe methods of assessment and diagnostic criteria for diseases                                                                                                   | 7-8 | 2.3.1 Exposure sources of serum iron status indicators;<br>2.3.2 Outcome sources of gout                                                                                             |
|   | e)                                        | Provide details of ethics committee approval and participant informed consent, if relevant                                                                                                                                      | 4   | As for MR studies, since it relies on summary-level data obtained from publicly available genome-wide association study (GWAS), no additional ethical approval was deemed necessary. |
| 5 | <b>Assumptions</b>                        | Explicitly state the three core IV assumptions for the main analysis (relevance, independence and exclusion restriction) as well assumptions for any additional or sensitivity analysis                                         | 4   | 2.1 Study design                                                                                                                                                                     |
| 6 | <b>Statistical methods: main analysis</b> | Describe statistical methods and statistics used                                                                                                                                                                                |     |                                                                                                                                                                                      |
|   | a)                                        | Describe how quantitative variables were handled in the analyses (i.e., scale, units, model)                                                                                                                                    | NA  |                                                                                                                                                                                      |
|   | b)                                        | Describe how genetic variants were handled in the analyses and, if applicable, how their                                                                                                                                        | 8-9 | 2.3.3 Statistical analysis                                                                                                                                                           |

|   |                                                     |                                                                                                                                                                                                                                         |     |                                                                                                                                                                                                                     |
|---|-----------------------------------------------------|-----------------------------------------------------------------------------------------------------------------------------------------------------------------------------------------------------------------------------------------|-----|---------------------------------------------------------------------------------------------------------------------------------------------------------------------------------------------------------------------|
|   |                                                     | weights were selected                                                                                                                                                                                                                   |     |                                                                                                                                                                                                                     |
|   |                                                     | c) Describe the MR estimator (e.g. two-stage least squares, Wald ratio) and related statistics. Detail the included covariates and, in case of two-sample MR, whether the same covariate set was used for adjustment in the two samples | NA  |                                                                                                                                                                                                                     |
|   |                                                     | d) Explain how missing data were addressed                                                                                                                                                                                              | 8-9 | 2.3.3 Statistical analysis                                                                                                                                                                                          |
|   |                                                     | e) If applicable, indicate how multiple testing was addressed                                                                                                                                                                           | 9   | To correct for multiple comparisons, we used the Bonferroni method, setting statistical significance at a P-value $\leq 0.0125$ ( $0.05/4$ ), based on the number of exposures included in the primary MR analyses. |
| 7 | <b>Assessment of assumptions</b>                    | Describe any methods or prior knowledge used to assess the assumptions or justify their validity                                                                                                                                        | 8-9 | 2.3.3 Statistical analysis                                                                                                                                                                                          |
| 8 | <b>Sensitivity analyses and additional analyses</b> | Describe any sensitivity analyses or additional analyses performed (e.g. comparison of effect estimates from different approaches, independent replication, bias analytic techniques, validation of instruments, simulations)           | 8-9 | 2.3.3 Statistical analysis                                                                                                                                                                                          |
| 9 | <b>Software and pre-registration</b>                |                                                                                                                                                                                                                                         |     |                                                                                                                                                                                                                     |
|   |                                                     | a) Name statistical software and package(s), including version and settings used                                                                                                                                                        | 9   | The statistical analysis was performed using R software version 4.1.3, using the "TwoSampleMR", "Mendelian Randomization", "Meta" and "MR-PRESSO" packages to explore the causal connection between iron            |

homeostasis-related indicators.

- b) State whether the study protocol and details were pre-registered (as well as when and where) NA

## RESULTS

### 10 Descriptive data

- a) Report the numbers of individuals at each stage of included studies and reasons for exclusion. 7-8 2.3.1 Exposure sources of serum iron status indicators  
Consider use of a flow diagram 2.3.2 Outcome sources of gout  
Figure 1

- b) Report summary statistics for phenotypic exposure(s), outcome(s), and other relevant variables (e.g. means, SDs, proportions) 7-8 2.3.1 Exposure sources of serum iron status indicators  
2.3.2 Outcome sources of gout

- c) If the data sources include meta-analyses of previous studies, provide the assessments of heterogeneity across these studies NA

- d) For two-sample MR: NA  
i. Provide justification of the similarity of the genetic variant-exposure associations between the exposure and outcome samples  
ii. Provide information on the number of individuals who overlap between the exposure and outcome studies

### 11 Main results

- a) Report the associations between genetic variant and exposure, and between genetic variant 10-11 3.2 Mendelian randomization analysis



|    |                                                     |                                                                                                                                                                                                                 |       |                                      |
|----|-----------------------------------------------------|-----------------------------------------------------------------------------------------------------------------------------------------------------------------------------------------------------------------|-------|--------------------------------------|
|    |                                                     | and outcome, preferably on an interpretable scale                                                                                                                                                               |       |                                      |
|    |                                                     | b) Report MR estimates of the relationship between exposure and outcome, and the measures of uncertainty from the MR analysis, on an interpretable scale, such as odds ratio or relative risk per SD difference | NA    |                                      |
|    |                                                     | c) If relevant, consider translating estimates of relative risk into absolute risk for a meaningful time period                                                                                                 | NA    |                                      |
|    |                                                     | d) Consider plots to visualize results (e.g. forest plot, scatterplot of associations between genetic variants and outcome versus between genetic variants and exposure)                                        | 10-11 | Figure 2-4                           |
| 12 | <b>Assessment of assumptions</b>                    |                                                                                                                                                                                                                 |       |                                      |
|    |                                                     | a) Report the assessment of the validity of the assumptions                                                                                                                                                     | 9-10  | 3.2 Mendelian randomization analysis |
|    |                                                     | b) Report any additional statistics (e.g., assessments of heterogeneity across genetic variants, such as $I^2$ , Q statistic or E-value)                                                                        | NA    |                                      |
| 13 | <b>Sensitivity analyses and additional analyses</b> |                                                                                                                                                                                                                 |       |                                      |
|    |                                                     | a) Report any sensitivity analyses to assess the robustness of the main results to violations of the assumptions                                                                                                | 8-9   | 2.3.3 Statistical analysis           |
|    |                                                     | b) Report results from other sensitivity analyses or additional analyses                                                                                                                                        | 10-11 | Table 3; Supplementary Table 12-13   |

|  |    |                                                                                    |    |            |
|--|----|------------------------------------------------------------------------------------|----|------------|
|  | c) | Report any assessment of direction of causal relationship (e.g., bidirectional MR) | NA |            |
|  | d) | When relevant, report and compare with estimates from non-MR analyses              | NA |            |
|  | e) | Consider additional plots to visualize results (e.g., leave-one-out analyses)      | 11 | Figure 2-3 |

## DISCUSSION

|    |                       |                                                                                                                                                                                                                                                                                                                                                      |       |                          |
|----|-----------------------|------------------------------------------------------------------------------------------------------------------------------------------------------------------------------------------------------------------------------------------------------------------------------------------------------------------------------------------------------|-------|--------------------------|
| 14 | <b>Key results</b>    | Summarize key results with reference to study objectives                                                                                                                                                                                                                                                                                             | 11    | Paragraph 1              |
| 15 | <b>Limitations</b>    | Discuss limitations of the study, taking into account the validity of the IV assumptions, other sources of potential bias, and imprecision. Discuss both direction and magnitude of any potential bias and any efforts to address them                                                                                                               | 14-15 | Paragraph 2              |
| 16 | <b>Interpretation</b> |                                                                                                                                                                                                                                                                                                                                                      |       |                          |
|    | a)                    | Meaning: Give a cautious overall interpretation of results in the context of their limitations and in comparison with other studies                                                                                                                                                                                                                  | 12    | Paragraph 1              |
|    | b)                    | Mechanism: Discuss underlying biological mechanisms that could drive a potential causal relationship between the investigated exposure and the outcome, and whether the gene-environment equivalence assumption is reasonable. Use causal language carefully, clarifying that IV estimates may provide causal effects only under certain assumptions | 13-14 | Paragraph 2; Paragraph 1 |
|    | c)                    | Clinical relevance: Discuss whether the results have clinical or public policy relevance, and to what extent they inform effect sizes of possible interventions                                                                                                                                                                                      | 13-14 | Paragraph 2; Paragraph 1 |

|                          |                              |                                                                                                                                                                                                                                                                                             |       |                       |
|--------------------------|------------------------------|---------------------------------------------------------------------------------------------------------------------------------------------------------------------------------------------------------------------------------------------------------------------------------------------|-------|-----------------------|
| 17                       | <b>Generalizability</b>      | Discuss the generalizability of the study results (a) to other populations, (b) across other exposure periods/timings, and (c) across other levels of exposure                                                                                                                              | 15    | Paragraph 1           |
| <b>OTHER INFORMATION</b> |                              |                                                                                                                                                                                                                                                                                             |       |                       |
| 18                       | <b>Funding</b>               | Describe sources of funding and the role of funders in the present study and, if applicable, sources of funding for the databases and original study or studies on which the present study is based                                                                                         | 17    | Funding               |
| 19                       | <b>Data and data sharing</b> | Provide the data used to perform all analyses or report where and how the data can be accessed, and reference these sources in the article. Provide the statistical code needed to reproduce the results in the article, or report whether the code is publicly accessible and if so, where | 16-17 | Data Availability     |
| 20                       | <b>Conflicts of Interest</b> | All authors should declare all potential conflicts of interest                                                                                                                                                                                                                              | 16    | Conflicts of interest |

This checklist is copyrighted by the Equator Network under the Creative Commons Attribution 3.0 Unported (CC BY 3.0) license.

1. Skrivankova VW, Richmond RC, Woolf BAR, Yarmolinsky J, Davies NM, Swanson SA, et al. Strengthening the Reporting of Observational Studies in Epidemiology using Mendelian Randomization (STROBE-MR) Statement. JAMA. 2021;under review.
2. Skrivankova VW, Richmond RC, Woolf BAR, Davies NM, Swanson SA, VanderWeele TJ, et al. Strengthening the Reporting of Observational Studies in Epidemiology using Mendelian Randomisation (STROBE-MR): Explanation and Elaboration. BMJ. 2021;375:n2233.

**Supplementary Table 3.** Characteristics of the genetic variants associated with the serum iron status indicators.

| Trait    | SNP        | Chr | Position  | Effect allele | Other allele | beta   | SE    | P         |
|----------|------------|-----|-----------|---------------|--------------|--------|-------|-----------|
| Ferritin | rs10801913 | 1   | 115671658 | A             | G            | 0.024  | 0.004 | 2.63E-10  |
| Ferritin | rs75965181 | 1   | 22257509  | A             | T            | -0.120 | 0.011 | 3.70E-26  |
| Ferritin | rs1250259  | 2   | 215435759 | T             | A            | -0.024 | 0.004 | 1.84E-10  |
| Ferritin | rs1260326  | 2   | 27508073  | T             | C            | 0.025  | 0.004 | 1.48E-12  |
| Ferritin | rs12693541 | 2   | 189553964 | C             | T            | 0.079  | 0.005 | 2.21E-48  |
| Ferritin | rs6757653  | 2   | 28948938  | T             | C            | 0.032  | 0.004 | 9.34E-16  |
| Ferritin | rs1131262  | 3   | 134222476 | T             | C            | -0.032 | 0.006 | 6.66E-09  |
| Ferritin | rs1799945  | 6   | 26090951  | G             | C            | 0.059  | 0.005 | 1.51E-31  |
| Ferritin | rs1800562  | 6   | 26092913  | A             | G            | 0.130  | 0.007 | 1.85E-84  |
| Ferritin | rs36184164 | 6   | 43813355  | G             | T            | 0.036  | 0.005 | 6.46E-12  |
| Ferritin | rs2529440  | 7   | 30472178  | T             | C            | -0.035 | 0.004 | 4.60E-23  |
| Ferritin | rs13253974 | 8   | 23520397  | A             | G            | 0.024  | 0.004 | 2.51E-11  |
| Ferritin | rs2954029  | 8   | 125478730 | T             | A            | -0.024 | 0.003 | 1.42E-12  |
| Ferritin | rs4841429  | 8   | 10711019  | G             | A            | 0.060  | 0.006 | 8.21E-21  |
| Ferritin | rs7865362  | 9   | 33117967  | T             | C            | 0.025  | 0.004 | 1.03E-11  |
| Ferritin | rs17476364 | 10  | 69334748  | C             | T            | 0.043  | 0.006 | 3.57E-14  |
| Ferritin | rs12419620 | 11  | 2211323   | G             | T            | -0.031 | 0.005 | 3.43E-11  |
| Ferritin | rs12807014 | 11  | 47738526  | C             | T            | -0.029 | 0.004 | 2.72E-13  |
| Ferritin | rs4938939  | 11  | 60393365  | A             | G            | 0.022  | 0.004 | 3.01E-09  |
| Ferritin | rs996347   | 14  | 33941686  | C             | T            | 0.049  | 0.004 | 2.99E-41  |
| Ferritin | rs3743171  | 15  | 65624189  | T             | A            | -0.024 | 0.004 | 2.92E-08  |
| Ferritin | rs57659670 | 15  | 45106240  | C             | T            | -0.140 | 0.006 | 1.05E-113 |
| Ferritin | rs3747602  | 16  | 4752385   | G             | T            | 0.021  | 0.004 | 2.47E-09  |
| Ferritin | rs9921222  | 16  | 325782    | C             | T            | 0.025  | 0.004 | 1.09E-12  |
| Ferritin | rs1542752  | 17  | 74942005  | T             | C            | 0.034  | 0.005 | 1.44E-12  |
| Ferritin | rs34523089 | 17  | 58358748  | T             | C            | 0.069  | 0.005 | 3.16E-48  |
| Ferritin | rs55789050 | 17  | 9890100   | T             | A            | -0.027 | 0.004 | 6.07E-14  |
| Ferritin | rs4808802  | 19  | 18467063  | C             | G            | 0.028  | 0.004 | 3.42E-11  |
| Ferritin | rs601338   | 19  | 48703417  | G             | A            | 0.028  | 0.003 | 7.04E-16  |
| Ferritin | rs708686   | 19  | 5840608   | T             | C            | -0.031 | 0.004 | 1.96E-14  |
| Ferritin | rs6029148  | 20  | 40495768  | A             | G            | 0.046  | 0.007 | 5.56E-12  |
| Ferritin | rs855791   | 22  | 37066896  | A             | G            | -0.044 | 0.003 | 6.14E-37  |
| Iron     | rs2228145  | 1   | 154454494 | C             | A            | 0.026  | 0.004 | 8.42E-11  |
| Iron     | rs35945185 | 1   | 65671556  | A             | G            | 0.031  | 0.004 | 1.54E-13  |
| Iron     | rs13007705 | 2   | 238160555 | T             | C            | 0.029  | 0.004 | 2.01E-12  |
| Iron     | rs4854760  | 3   | 133779897 | G             | A            | 0.053  | 0.004 | 5.67E-33  |
| Iron     | rs7630745  | 3   | 66376605  | C             | T            | 0.025  | 0.004 | 2.09E-09  |
| Iron     | rs1799945  | 6   | 26090951  | G             | C            | 0.170  | 0.006 | 1.26E-187 |
| Iron     | rs1800562  | 6   | 26092913  | A             | G            | 0.270  | 0.008 | 1.00E-200 |

|      |             |    |           |   |   |        |       |           |
|------|-------------|----|-----------|---|---|--------|-------|-----------|
| Iron | rs9399136   | 6  | 135081201 | C | T | 0.057  | 0.005 | 1.08E-36  |
| Iron | rs12718598  | 7  | 50360747  | C | T | 0.027  | 0.004 | 3.69E-11  |
| Iron | rs7385804   | 7  | 100638347 | C | A | -0.057 | 0.004 | 9.42E-43  |
| Iron | rs57659670  | 15 | 45106240  | C | T | -0.042 | 0.007 | 1.08E-08  |
| Iron | rs77262773  | 17 | 69253570  | T | C | 0.081  | 0.013 | 9.54E-10  |
| Iron | rs2005682   | 19 | 35456759  | T | A | -0.029 | 0.004 | 2.37E-11  |
| Iron | rs855791    | 22 | 37066896  | A | G | -0.170 | 0.005 | 1.00E-200 |
| TIBC | rs12693541  | 2  | 189553964 | C | T | -0.048 | 0.007 | 2.53E-11  |
| TIBC | rs3817672   | 3  | 196073940 | C | T | -0.031 | 0.005 | 6.32E-11  |
| TIBC | rs4854760   | 3  | 133779897 | G | A | 0.340  | 0.009 | 1.00E-200 |
| TIBC | rs59950280  | 4  | 3450618   | A | G | 0.033  | 0.005 | 5.87E-11  |
| TIBC | rs1799945   | 6  | 26090951  | G | C | -0.120 | 0.007 | 4.29E-66  |
| TIBC | rs1800562   | 6  | 26092913  | A | G | -0.450 | 0.012 | 1.00E-200 |
| TIBC | rs9399136   | 6  | 135081201 | C | T | -0.033 | 0.005 | 2.65E-10  |
| TIBC | rs1495743   | 8  | 18415790  | G | C | -0.043 | 0.006 | 9.00E-14  |
| TIBC | rs174546    | 11 | 61802358  | T | C | 0.046  | 0.005 | 6.62E-22  |
| TIBC | rs17580     | 14 | 94380925  | A | T | 0.076  | 0.012 | 1.19E-10  |
| TIBC | rs57659670  | 15 | 45106240  | C | T | 0.077  | 0.009 | 3.67E-19  |
| TIBC | rs112727702 | 19 | 49587947  | T | G | 0.043  | 0.006 | 2.08E-14  |
| TIBC | rs1132274   | 20 | 17615510  | A | C | 0.036  | 0.006 | 1.93E-08  |
| TIBC | rs855791    | 22 | 37066896  | A | G | 0.026  | 0.005 | 2.88E-08  |
| TSAT | rs13007705  | 2  | 238160555 | T | C | 0.033  | 0.005 | 1.10E-12  |
| TSAT | rs3817672   | 3  | 196073940 | C | T | 0.026  | 0.005 | 2.29E-08  |
| TSAT | rs4854760   | 3  | 133779897 | G | A | -0.096 | 0.005 | 9.95E-83  |
| TSAT | rs1799945   | 6  | 26090951  | G | C | 0.210  | 0.007 | 1.00E-200 |
| TSAT | rs1800562   | 6  | 26092913  | A | G | 0.450  | 0.012 | 1.00E-200 |
| TSAT | rs9399136   | 6  | 135081201 | C | T | 0.067  | 0.005 | 5.32E-39  |
| TSAT | rs7385804   | 7  | 100638347 | C | A | -0.062 | 0.005 | 2.87E-39  |
| TSAT | rs57659670  | 15 | 45106240  | C | T | -0.058 | 0.008 | 5.73E-12  |
| TSAT | rs2005682   | 19 | 35456759  | T | A | -0.032 | 0.005 | 6.25E-11  |
| TSAT | rs855791    | 22 | 37066896  | A | G | -0.170 | 0.005 | 1.00E-200 |

---

Abbreviations: Chr, chromosome; SE, standard error; SNP, single-nucleotide polymorphism  
TIBC, total iron-binding capacity; TSAT, transferrin saturation.

**Supplementary Table 4.** Odds ratio (95% CI) for prevalent gout according to serum iron status indicators among participants in NHANES 2017–2018 (N=4,635).

| Variables          | Model 1 |           |          | Model 2 |           |          |
|--------------------|---------|-----------|----------|---------|-----------|----------|
|                    | OR      | 95%CI     | <i>P</i> | OR      | 95%CI     | <i>P</i> |
| Ferritin (ng/mL)   | 1.00    | 1.00-1.00 | 0.071    | 1.00    | 1.00-1.00 | 0.144    |
| Q1 (1.04-51)       | Ref     | Ref       | Ref      | Ref     | Ref       | Ref      |
| Q2 (51.1-104)      | 1.03    | 0.47-2.24 | 0.939    | 1.00    | 0.43-2.32 | 0.999    |
| Q3 (105-191)       | 1.33    | 0.60-2.92 | 0.508    | 1.29    | 0.59-2.83 | 0.643    |
| Q4 (192-5190)      | 1.53    | 0.89-2.65 | 0.176    | 1.49    | 0.83-2.67 | 0.407    |
| Serum iron (ug/dL) | 1.00    | 0.99-1.00 | 0.141    | 1.00    | 0.99-1.01 | 0.614    |
| Q1 (11-63)         | Ref     | Ref       | Ref      | Ref     | Ref       | Ref      |
| Q2 (64-84)         | 0.92    | 0.57-1.46 | 0.725    | 1.01    | 0.60-1.70 | 0.987    |
| Q3 (85-107)        | 0.64    | 0.34-1.22 | 0.227    | 0.76    | 0.37-1.58 | 0.601    |
| Q4 (108-296)       | 0.71    | 0.41-1.26 | 0.289    | 0.92    | 0.47-1.80 | 0.846    |
| TIBC (ug/dL)       | 1.00    | 1.00-1.01 | 0.747    | 1.00    | 0.99-1.00 | 0.859    |
| Q1 (139-292)       | Ref     | Ref       | Ref      | Ref     | Ref       | Ref      |
| Q2 (293-322)       | 1.73    | 0.87-3.46 | 0.170    | 1.67    | 0.84-3.33 | 0.381    |
| Q3 (323-353)       | 1.05    | 0.56-1.95 | 0.887    | 0.92    | 0.49-1.72 | 0.831    |
| Q4 (354-605)       | 1.25    | 0.68-2.29 | 0.497    | 1.07    | 0.58-1.96 | 0.863    |
| TSAT (%)           | 0.98    | 0.96-1.01 | 0.178    | 0.99    | 0.97-1.02 | 0.711    |
| Q1 (2-20)          | Ref     | Ref       | Ref      | Ref     | Ref       | Ref      |
| Q2 (21-26)         | 0.83    | 0.47-1.48 | 0.551    | 0.95    | 0.51-1.78 | 0.901    |
| Q3 (27-34)         | 0.79    | 0.44-1.44 | 0.474    | 0.95    | 0.46-1.94 | 0.903    |
| Q4 (35-92)         | 0.62    | 0.32-1.20 | 0.204    | 0.86    | 0.40-1.86 | 0.768    |

Abbreviations: CI, confidence interval; OR, odds ratio; NHANES, National Health and Nutrition Examination Survey; Ref, reference; TIBC, total iron-binding capacity; TSAT, transferrin saturation.

Model 1 was adjusted for age, gender (male, female) and ethnicity (Mexican American, other Hispanic origins, non-Hispanic White, non-Hispanic Black, and other race).

Model 2 was adjusted for age, gender, ethnicity, body mass index (BMI) (<25.0, 25.0 to <30.0, and  $\geq 30.0$  kg/m<sup>2</sup>), smoking status (never, former, and current), hypertension and diabetes.

**Supplementary Table 5.** Odds ratio (95% CI) for prevalent gout according to serum iron status indicators among male adults in NHANES 2017–2018 (N = 2,216).

| Variables          | Model 1 |           |          | Model 2 |           |          |
|--------------------|---------|-----------|----------|---------|-----------|----------|
|                    | OR      | 95%CI     | <i>P</i> | OR      | 95%CI     | <i>P</i> |
| Ferritin (ng/mL)   | 1.00    | 1.00-1.00 | 0.596    | 1.00    | 1.00-1.00 | 0.712    |
| Q1                 | Ref     | Ref       | Ref      | Ref     | Ref       | Ref      |
| Q2                 | 0.56    | 0.19-1.69 | 0.341    | 1.84    | 0.16-1.71 | 0.393    |
| Q3                 | 0.78    | 0.31-1.99 | 0.621    | 1.63    | 0.30-2.01 | 0.652    |
| Q4                 | 0.81    | 0.29-2.23 | 0.696    | 1.72    | 0.27-2.28 | 0.696    |
| Serum iron (ug/dL) | 1.00    | 0.99-1.01 | 0.504    | 1.01    | 0.99-1.01 | 0.802    |
| Q1                 | Ref     | Ref       | Ref      | Ref     | Ref       | Ref      |
| Q2                 | 0.88    | 0.43-1.78 | 0.730    | 1.45    | 0.44-1.92 | 0.850    |
| Q3                 | 0.64    | 0.25-1.62 | 0.379    | 1.71    | 0.25-2.10 | 0.618    |
| Q4                 | 0.82    | 0.33-2.05 | 0.686    | 1.67    | 0.36-2.68 | 0.981    |
| TIBC (ug/dL)       | 1.00    | 1.00-1.01 | 0.228    | 1.00    | 1.00-1.01 | 0.402    |
| Q1                 | Ref     | Ref       | Ref      | Ref     | Ref       | Ref      |
| Q2                 | 1.82    | 0.88-3.78 | 0.151    | 1.46    | 0.85-3.75 | 0.265    |
| Q3                 | 1.11    | 0.61-2.00 | 0.748    | 1.37    | 0.52-1.78 | 0.916    |
| Q4                 | 1.65    | 0.76-3.58 | 0.243    | 1.51    | 0.68-3.40 | 0.416    |
| TSAT (%)           | 0.98    | 0.95-1.02 | 0.419    | 1.02    | 0.95-1.03 | 0.713    |
| Q1                 | Ref     | Ref       | Ref      | Ref     | Ref       | Ref      |
| Q2                 | 0.67    | 0.32-1.41 | 0.329    | 1.50    | 0.34-1.69 | 0.569    |
| Q3                 | 0.73    | 0.30-1.78 | 0.509    | 1.71    | 0.29-2.37 | 0.757    |
| Q4                 | 0.60    | 0.22-1.68 | 0.367    | 1.80    | 0.25-2.45 | 0.710    |

Abbreviations: CI, confidence interval; OR, odds ratio; NHANES, National Health and Nutrition Examination Survey; Ref, reference; TIBC, total iron-binding capacity; TSAT, transferrin saturation.

Model 1 was adjusted for age and ethnicity (Mexican American, other Hispanic origins, non-Hispanic White, non-Hispanic Black, and other race).

Model 2 was adjusted for age, ethnicity, body mass index (BMI) (<25.0, 25.0 to <30.0, and ≥30.0 kg/m<sup>2</sup>), smoking status (never, former, and current), hypertension and diabetes.

**Supplementary Table 6.** Odds ratio (95% CI) for prevalent gout according to serum iron status indicators among female adults in NHANES 2017–2018 (N = 2,419).

| Variables          | Model 1 |            |          | Model 2 |            |          |
|--------------------|---------|------------|----------|---------|------------|----------|
|                    | OR      | 95%CI      | <i>P</i> | OR      | 95%CI      | <i>P</i> |
| Ferritin (ng/mL)   | 1.00    | 1.00-1.00  | 0.053    | 1.00    | 1.00-1.00  | 0.087    |
| Q1                 | Ref     | Ref        | Ref      | Ref     | Ref        | Ref      |
| Q2                 | 1.96    | 1.09-3.51  | 0.060    | 2.06    | 1.12-3.80  | 0.146    |
| Q3                 | 2.36    | 0.85-6.54  | 0.142    | 2.12    | 0.81-5.58  | 0.267    |
| Q4                 | 4.17    | 1.45-11.93 | 0.033    | 4.16    | 1.45-11.92 | 0.118    |
| Serum iron (ug/dL) | 0.99    | 0.98-1.00  | 0.207    | 1.00    | 0.99-1.01  | 0.520    |
| Q1                 | Ref     | Ref        | Ref      | Ref     | Ref        | Ref      |
| Q2                 | 1.02    | 0.46-2.27  | 0.962    | 1.21    | 0.54-2.70  | 0.687    |
| Q3                 | 0.68    | 0.34-1.35  | 0.306    | 0.85    | 0.42-1.71  | 0.692    |
| Q4                 | 0.45    | 0.15-1.35  | 0.195    | 0.62    | 0.21-1.80  | 0.471    |
| TIBC (ug/dL)       | 1.00    | 0.99-1.00  | 0.193    | 0.99    | 0.99-1.00  | 0.060    |
| Q1                 | Ref     | Ref        | Ref      | Ref     | Ref        | Ref      |
| Q2                 | 1.56    | 0.66-3.70  | 0.344    | 1.48    | 0.63-3.48  | 0.460    |
| Q3                 | 0.91    | 0.32-2.59  | 0.867    | 0.84    | 0.28-2.53  | 0.787    |
| Q4                 | 0.75    | 0.31-1.84  | 0.553    | 0.56    | 0.26-1.18  | 0.268    |
| TSAT (%)           | 0.99    | 0.96-1.02  | 0.363    | 1.00    | 0.97-1.03  | 0.961    |
| Q1                 | Ref     | Ref        | Ref      | Ref     | Ref        | Ref      |
| Q2                 | 1.12    | 0.62-2.01  | 0.721    | 1.27    | 0.71-2.29  | 0.502    |
| Q3                 | 0.88    | 0.41-1.92  | 0.763    | 1.14    | 0.54-2.42  | 0.768    |
| Q4                 | 0.54    | 0.22-1.33  | 0.220    | 0.83    | 0.34-2.01  | 0.719    |

Abbreviations: CI, confidence interval; OR, odds ratio; NHANES, National Health and Nutrition Examination Survey; Ref, reference; TIBC, total iron-binding capacity; TSAT, transferrin saturation.

Model 1 was adjusted for age and ethnicity (Mexican American, other Hispanic origins, non-Hispanic White, non-Hispanic Black, and other race).

Model 2 was adjusted for age, ethnicity, body mass index (BMI) (<25.0, 25.0 to <30.0, and ≥30.0 kg/m<sup>2</sup>), smoking status (never, former, and current), hypertension and diabetes.



**Supplementary Table 7.** Odds ratio (95% CI) for prevalent gout according to serum iron status indicators among people older than 50 years in NHANES 2017–2018 (N = 2,465).

| Variables          | Model 1 |           |          | Model 2 |           |          |
|--------------------|---------|-----------|----------|---------|-----------|----------|
|                    | OR      | 95%CI     | <i>P</i> | OR      | 95%CI     | <i>P</i> |
| Ferritin (ng/mL)   | 1.00    | 1.00-1.00 | 0.921    | 1.00    | 1.00-1.00 | 0.974    |
| Q1                 | Ref     | Ref       | Ref      | Ref     | Ref       | Ref      |
| Q2                 | 0.92    | 0.34-2.51 | 0.876    | 1.76    | 0.29-2.71 | 0.861    |
| Q3                 | 1.22    | 0.57-2.64 | 0.624    | 1.49    | 0.55-2.59 | 0.699    |
| Q4                 | 0.99    | 0.59-1.68 | 0.977    | 1.35    | 0.55-1.81 | 0.999    |
| Serum iron (ug/dL) | 0.99    | 0.99-1.00 | 0.062    | 1.00    | 0.99-1.00 | 0.365    |
| Q1                 | Ref     | Ref       | Ref      | Ref     | Ref       | Ref      |
| Q2                 | 0.80    | 0.48-1.35 | 0.435    | 1.33    | 0.50-1.51 | 0.667    |
| Q3                 | 0.51    | 0.26-1.00 | 0.091    | 1.48    | 0.27-1.25 | 0.302    |
| Q4                 | 0.66    | 0.40-1.09 | 0.152    | 1.38    | 0.44-1.53 | 0.591    |
| TIBC (ug/dL)       | 1.00    | 1.00-1.01 | 0.769    | 1.00    | 0.99-1.01 | 0.998    |
| Q1                 | Ref     | Ref       | Ref      | Ref     | Ref       | Ref      |
| Q2                 | 1.73    | 0.81-3.71 | 0.202    | 1.50    | 0.77-3.73 | 0.322    |
| Q3                 | 1.00    | 0.51-1.95 | 0.997    | 1.42    | 0.44-1.77 | 0.766    |
| Q4                 | 1.30    | 0.72-2.35 | 0.416    | 1.34    | 0.66-2.11 | 0.624    |
| TSAT (%)           | 0.98    | 0.96-1.00 | 0.126    | 1.01    | 0.96-1.01 | 0.507    |
| Q1                 | Ref     | Ref       | Ref      | Ref     | Ref       | Ref      |
| Q2                 | 0.89    | 0.48-1.65 | 0.717    | 1.39    | 0.51-1.89 | 0.962    |
| Q3                 | 0.74    | 0.38-1.42 | 0.391    | 1.48    | 0.38-1.79 | 0.673    |
| Q4                 | 0.59    | 0.32-1.10 | 0.141    | 1.45    | 0.37-1.61 | 0.561    |

Abbreviations: CI, confidence interval; OR, odds ratio; NHANES, National Health and Nutrition Examination Survey; Ref, reference; TIBC, total iron-binding capacity; TSAT, transferrin saturation.

Model 1 was adjusted for gender (male, female) and ethnicity (Mexican American, other Hispanic origins, non-Hispanic White, non-Hispanic Black, and other race).

Model 2 was adjusted for gender, ethnicity, body mass index (BMI) (<25.0, 25.0 to <30.0, and ≥30.0 kg/m<sup>2</sup>), smoking status (never, former, and current), hypertension and diabetes.

**Supplementary Table 8.** Odds ratio (95% CI) for prevalent gout according to serum iron status indicators among people less than 50 years in NHANES 2017–2018 (N = 2,170).

| Variables          | Model 1 |            |          | Model 2 |            |          |
|--------------------|---------|------------|----------|---------|------------|----------|
|                    | OR      | 95%CI      | <i>P</i> | OR      | 95%CI      | <i>P</i> |
| Ferritin (ng/mL)   | 1.00    | 1.00-1.00  | 0.001    | 1.00    | 1.00-1.00  | 0.022    |
| Q1                 | Ref     | Ref        | Ref      | Ref     | Ref        | Ref      |
| Q2                 | 2.14    | 0.62-7.36  | 0.269    | 1.85    | 0.53-6.41  | 0.434    |
| Q3                 | 2.70    | 0.38-18.96 | 0.351    | 2.28    | 0.33-15.92 | 0.493    |
| Q4                 | 11.79   | 1.50-92.74 | 0.052    | 9.04    | 0.98-83.58 | 0.192    |
| Serum iron (ug/dL) | 1.00    | 0.99-1.01  | 0.634    | 1.00    | 0.99-1.01  | 0.710    |
| Q1                 | Ref     | Ref        | Ref      | Ref     | Ref        | Ref      |
| Q2                 | 1.59    | 0.45-5.61  | 0.496    | 2.01    | 0.52-7.72  | 0.417    |
| Q3                 | 1.30    | 0.43-3.95  | 0.661    | 1.97    | 0.54-7.15  | 0.412    |
| Q4                 | 0.96    | 0.26-3.62  | 0.957    | 1.39    | 0.36-5.36  | 0.678    |
| TIBC (ug/dL)       | 1.00    | 0.99-1.00  | 0.233    | 0.99    | 0.98-1.00  | 0.237    |
| Q1                 | Ref     | Ref        | Ref      | Ref     | Ref        | Ref      |
| Q2                 | 1.22    | 0.43-3.42  | 0.720    | 1.05    | 0.36-3.09  | 0.932    |
| Q3                 | 0.72    | 0.20-2.57  | 0.628    | 0.63    | 0.16-2.52  | 0.582    |
| Q4                 | 0.55    | 0.17-1.80  | 0.358    | 0.42    | 0.11-1.57  | 0.325    |
| TSAT (%)           | 1.00    | 0.97-1.02  | 0.873    | 1.01    | 0.99-1.04  | 0.433    |
| Q1                 | Ref     | Ref        | Ref      | Ref     | Ref        | Ref      |
| Q2                 | 0.52    | 0.18-1.52  | 0.272    | 0.66    | 0.21-2.11  | 0.554    |
| Q3                 | 1.06    | 0.36-3.07  | 0.920    | 1.39    | 0.48-4.09  | 0.607    |
| Q4                 | 0.72    | 0.21-2.43  | 0.611    | 1.07    | 0.31-3.68  | 0.923    |

Abbreviations: CI, confidence interval; OR, odds ratio; NHANES, National Health and Nutrition Examination Survey; Ref, reference; TIBC, total iron-binding capacity; TSAT, transferrin saturation.

Model 1 was adjusted for gender (male, female) and ethnicity (Mexican American, other Hispanic origins, non-Hispanic White, non-Hispanic Black, and other race).

Model 2 was adjusted for gender, ethnicity, body mass index (BMI) (<25.0, 25.0 to <30.0, and ≥30.0 kg/m<sup>2</sup>), smoking status (never, former, and current), hypertension and diabetes.

**Supplementary Table 9.** Odds ratio (95% CI) for prevalent gout according to serum iron status indicators among participants in NHANES 2017–2018 (weighted) after multiple imputations (N=4,881).

| Variables        | Model 1          |          | Model 2          |          |
|------------------|------------------|----------|------------------|----------|
|                  | OR (95%CI)       | <i>P</i> | OR (95%CI)       | <i>P</i> |
| Ferritin (ng/mL) | 1.00 (1.00-1.00) | 0.078    | 1.00 (1.00-1.00) | 0.170    |
| Quantile 1       | 1.00 (Reference) |          | 1.00 (Reference) |          |
| Quantile 2       | 0.92 (0.41-2.10) | 0.855    | 0.92 (0.38-2.22) | 0.878    |
| Quantile 3       | 1.05 (0.48-2.27) | 0.909    | 1.05 (0.49-2.26) | 0.917    |
| Quantile 4       | 1.22 (0.72-2.07) | 0.495    | 1.22 (0.73-2.05) | 0.587    |
| Iron (ug/dL)     | 0.99 (0.99-1.00) | 0.065    | 1.00 (0.99-1.00) | 0.354    |
| Quantile 1       | 1.00 (Reference) |          | 1.00 (Reference) |          |
| Quantile 2       | 0.90 (0.57-1.42) | 0.660    | 1.00 (0.62-1.61) | 0.994    |
| Quantile 3       | 0.65 (0.34-1.24) | 0.239    | 0.76 (0.39-1.48) | 0.566    |
| Quantile 4       | 0.70 (0.41-1.20) | 0.247    | 0.88 (0.50-1.55) | 0.728    |
| TIBC (ug/dL)     | 1.00 (1.00-1.01) | 0.594    | 1.00 (1.00-1.00) | 0.902    |
| Quantile 1       | 1.00 (Reference) |          | 1.00 (Reference) |          |
| Quantile 2       | 1.77 (0.94-3.33) | 0.125    | 1.73 (0.92-3.27) | 0.340    |
| Quantile 3       | 1.17 (0.66-2.05) | 0.612    | 1.01 (0.57-1.78) | 0.986    |
| Quantile 4       | 1.38 (0.79-2.41) | 0.306    | 1.18 (0.68-2.02) | 0.664    |
| TSAT (%)         | 0.98 (0.96-1.00) | 0.099    | 0.99 (0.97-1.01) | 0.470    |
| Quantile 1       | 1.00 (Reference) |          | 1.00 (Reference) |          |
| Quantile 2       | 1.07 (0.65-1.75) | 0.804    | 1.24 (0.74-2.07) | 0.563    |
| Quantile 3       | 0.69 (0.40-1.20) | 0.238    | 0.84 (0.45-1.57) | 0.686    |
| Quantile 4       | 0.76 (0.43-1.35) | 0.391    | 1.02 (0.55-1.91) | 0.958    |

OR: Odds Ratio, CI: Confidence Interval

Model 1: Adjust: Age, Gender, Race

Model 2: Adjust: Age, Gender, Race, Smoke, BMI, Hypertension, Diabetes

**Supplementary Table 10.** Odds ratio (95% CI) for prevalent gout according to serum iron status indicators among participants in NHANES 2017–2018 after fully adjusted.

| Variables        | Model            |              |
|------------------|------------------|--------------|
|                  | OR (95%CI)       | <i>P</i>     |
| Ferritin (ng/mL) | 1.00 (1.00-1.00) | 0.722        |
| Quantile 1       | 1.00 (Reference) |              |
| Quantile 2       | 1.81 (0.90-3.63) | 0.096        |
| Quantile 3       | 1.42 (0.71-2.84) | 0.327        |
| Quantile 4       | 1.80 (0.92-3.52) | 0.084        |
| Iron (ug/dL)     | 0.99 (0.99-0.99) | <b>0.035</b> |
| Quantile 1       | 1.00 (Reference) |              |
| Quantile 2       | 1.15 (0.66-2.01) | 0.624        |
| Quantile 3       | 0.84 (0.48-1.47) | 0.539        |
| Quantile 4       | 0.75 (0.42-1.36) | 0.345        |
| TIBC (ug/dL)     | 1.00 (1.00-1.00) | 0.982        |
| Quantile 1       | 1.00 (Reference) |              |
| Quantile 2       | 1.22 (0.73-2.06) | 0.450        |
| Quantile 3       | 1.23 (0.74-2.05) | 0.423        |
| Quantile 4       | 1.02 (0.57-1.82) | 0.953        |
| TSAT (%)         | 0.98 (0.96-0.99) | <b>0.048</b> |
| Quantile 1       | 1.00 (Reference) |              |
| Quantile 2       | 0.87 (0.49-1.57) | 0.649        |
| Quantile 3       | 0.87 (0.50-1.51) | 0.626        |
| Quantile 4       | 0.58 (0.32-1.04) | 0.068        |

OR: Odds Ratio, CI: Confidence Interval

Model: Adjust: Age, Gender, Race, education, PIR, BMI, Smoke, Drink, Hypertension, Diabetes, HDL, LDL

**Supplementary Table 11.** Odds ratio (95% CI) for prevalent gout according to serum iron status indicators after propensity score matching by sex and age in a ratio of 1:4 (N=1,271).

| Variables        | Model 1           |          | Model 2          |          |
|------------------|-------------------|----------|------------------|----------|
|                  | OR (95%CI)        | <i>P</i> | OR (95%CI)       | <i>P</i> |
| Ferritin (ng/mL) | 1.00 (1.00-1.00)  | 0.689    | 1.00 (1.00-1.00) | 0.814    |
| Quantile 1       | 1.00 (Reference)  |          | 1.00 (Reference) |          |
| Quantile 2       | 1.27 (0.51-3.19)  | 0.627    | 1.30 (0.51-3.32) | 0.682    |
| Quantile 3       | 1.47(0.56-3.86)   | 0.467    | 1.43 (0.55-3.72) | 0.599    |
| Quantile 4       | 1.32(0.71-2.45)   | 0.414    | 1.31 (0.66-2.58) | 0.582    |
| Iron (ug/dL)     | 1.00 (0.99-1.00)  | 0.231    | 1.00 (0.99-1.00) | 0.333    |
| Quantile 1       | 1.00 (Reference)  |          | 1.00 (Reference) |          |
| Quantile 2       | 0.94(0.55-1.58)   | 0.815    | 0.96 (0.55-1.68) | 0.900    |
| Quantile 3       | 0.59 (0.30-1.19)  | 0.192    | 0.61 (0.28-1.32) | 0.428    |
| Quantile 4       | 0.75 (0.37-1.52)  | 0.450    | 0.74 (0.33-1.65) | 0.595    |
| TIBC (ug/dL)     | 1.00 (0.99-1.00)  | 0.886    | 1.00 (0.99-1.00) | 0.888    |
| Quantile 1       | 1.00 (Reference)  |          | 1.00 (Reference) |          |
| Quantile 2       | 1.39 (0.61-3.18)  | 0.459    | 1.39 (0.62-3.11) | 0.566    |
| Quantile 3       | 0.82 (0.40-1.66)  | 0.594    | 0.82 (0.41-1.63) | 0.674    |
| Quantile 4       | 1.12 (0.55-2.25)  | 0.768    | 1.10 (0.54-2.26) | 0.834    |
| TSAT (%)         | 0.99 (0.96~ 1.01) | 0.308    | 0.99 (0.96-1.01) | 0.407    |
| Quantile 1       | 1.00 (Reference)  |          | 1.00 (Reference) |          |
| Quantile 2       | 0.77 (0.43-1.39)  | 0.418    | 0.79 (0.42-1.49) | 0.594    |
| Quantile 3       | 0.76 (0.37-1.54)  | 0.469    | 0.75 (0.34-1.69) | 0.615    |
| Quantile 4       | 0.61 (0.28-1.31)  | 0.250    | 0.60 (0.25-1.46) | 0.463    |

OR: Odds Ratio, CI: Confidence Interval

Model 1: Adjust: Age, Gender

Model 2: Adjust: Age, Gender, Smoke, BMI, Hypertension, Diabetes

**Supplementary Table 12.** Effect estimates of the associations between serum iron status indicators and risk of gout in FinnGen.

| Methods                     | No. SNPs | OR   | 95% CI    | P-value |
|-----------------------------|----------|------|-----------|---------|
| <b>Ferritin-2021</b>        |          |      |           |         |
| Inverse-variance weighted   | 32       | 1.24 | 0.89-1.73 | 0.199   |
| Weighted median             | 32       | 1.10 | 0.79-1.52 | 0.574   |
| Maximum-likelihood method   | 32       | 1.25 | 0.90-1.75 | 0.189   |
| MR-PRESSO test (1 outliers) | 31       | 1.24 | 0.89-1.73 | 0.208   |
| MR-Egger                    | 32       | /    | /         | 0.435*  |
| <b>Iron-2021</b>            |          |      |           |         |
| Inverse-variance weighted   | 12       | 1.24 | 1.06-1.46 | 0.009   |
| Weighted median             | 12       | 1.28 | 1.03-1.59 | 0.026   |
| Maximum-likelihood method   | 12       | 1.25 | 1.03-1.50 | 0.024   |
| MR-PRESSO test              | 12       | 1.24 | 1.03-1.50 | 0.048   |
| MR-Egger                    | 12       | /    | /         | 0.853*  |
| <b>TIBC-2021</b>            |          |      |           |         |
| Inverse-variance weighted   | 12       | 1.03 | 0.89-1.20 | 0.648   |
| Weighted median             | 12       | 1.10 | 0.98-1.23 | 0.099   |
| Maximum-likelihood method   | 12       | 1.04 | 0.89-1.20 | 0.643   |
| MR-PRESSO test (1 outliers) | 11       | 1.03 | 0.89-1.20 | 0.656   |
| MR-Egger                    | 12       | /    | /         | 0.044*  |
| <b>TSAT-2021</b>            |          |      |           |         |
| Inverse-variance weighted   | 9        | 1.10 | 0.92-1.32 | 0.299   |
| Weighted median             | 9        | 1.13 | 0.93-1.39 | 0.224   |
| Maximum-likelihood method   | 9        | 1.10 | 0.92-1.32 | 0.297   |
| MR-PRESSO test (1 outliers) | 8        | 1.10 | 0.92-1.32 | 0.330   |
| MR-Egger                    | 9        | /    | /         | 0.544*  |

Abbreviations: CI, confidence interval; MR, Mendelian randomization; MR-PRESSO, MR pleiotropy residual sum and outlier; No., number of; OR, odds ratio; TIBC, total iron-binding capacity; TSAT, transferrin saturation. \*P-value of the intercept from MR-Egger regression analysis.

**Supplementary Table 13.** Effect estimates of the associations between serum iron status indicators and risk of gout in Global Urate Genetics Consortium.

| Method                      | No. SNPs | OR   | 95% CI    | P-value |
|-----------------------------|----------|------|-----------|---------|
| <b>Ferritin-2021</b>        |          |      |           |         |
| Inverse-variance weighted   | 19       | 1.87 | 1.00-3.49 | 0.049   |
| Weighted median             | 19       | 1.70 | 0.87-3.33 | 0.123   |
| Maximum-likelihood method   | 19       | 1.91 | 1.02-3.59 | 0.043   |
| MR-PRESSO test (1 outliers) | 18       | 1.87 | 1.00-3.49 | 0.065   |
| MR-Egger                    | 19       | /    | /         | 0.722*  |
| <b>Iron-2021</b>            |          |      |           |         |
| Inverse-variance weighted   | 6        | 1.38 | 1.08-1.78 | 0.011   |
| Weighted median             | 6        | 1.73 | 1.24-2.40 | 0.001   |
| Maximum-likelihood method   | 6        | 1.38 | 1.08-1.78 | 0.011   |
| MR-PRESSO test (1 outliers) | 6        | 1.38 | 1.11-1.73 | 0.035   |
| MR-Egger                    | 6        | /    | /         | 0.679*  |
| <b>TIBC-2021</b>            |          |      |           |         |
| Inverse-variance weighted   | 8        | 0.90 | 0.76-1.05 | 0.172   |
| Weighted median             | 8        | 0.88 | 0.73-1.07 | 0.215   |
| Maximum-likelihood method   | 8        | 0.21 | 0.75-1.06 | 0.895   |
| MR-PRESSO test (1 outliers) | 7        | 0.90 | 0.75-1.06 | 0.249   |
| MR-Egger                    | 8        | /    | /         | 0.974*  |
| <b>TSAT-2021</b>            |          |      |           |         |
| Inverse-variance weighted   | 6        | 1.29 | 1.07-1.57 | 0.009   |
| Weighted median             | 6        | 1.35 | 1.07-1.70 | 0.011   |
| Maximum-likelihood method   | 6        | 1.29 | 1.07-1.57 | 0.009   |
| MR-PRESSO test (1 outliers) | 6        | 1.29 | 1.10-1.52 | 0.027   |
| MR-Egger                    | 6        | /    | /         | 0.456*  |

Abbreviations: CI, confidence interval; MR, Mendelian randomization; MR-PRESSO, MR pleiotropy residual sum and outlier; No., number of; OR, odds ratio; TIBC, total iron-binding capacity; TSAT, transferrin saturation. \*P-value of the intercept from MR-Egger regression analysis.

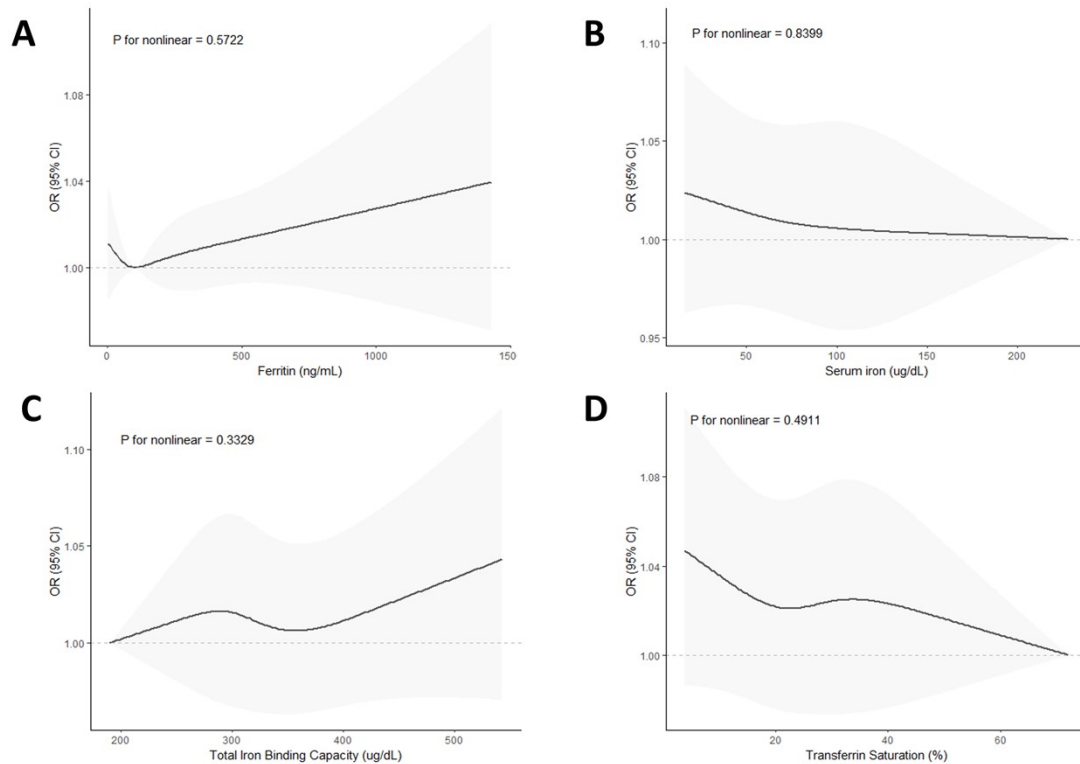

**Supplementary Figure 1.** Observational association of serum iron status indicators with gout risk using a restricted cubic spline model. (A) Association between serum ferritin (ng/mL) levels and gout risk ( $P$ -value for nonlinearity = 0.5722). (B) Association between serum iron ( $\mu\text{g/dL}$ ) levels and gout risk ( $P$ -value for nonlinearity = 0.8399). (C) Association between total iron-binding capacity (TIBC) ( $\mu\text{g/dL}$ ) and gout risk ( $P$ -value for nonlinearity = 0.3329). (D) Association between transferrin saturation (%) and gout risk ( $P$ -value for nonlinearity = 0.4911). In the analysis, the model was adjusted to age, gender, ethnicity, smoking status, BMI, hypertension and diabetes. Each figure represents the adjusted odds ratio for gout risk relative to specific iron status indicators, with a shaded gray area depicting the 95% confidence interval.
